# Supplementary material for: The medicinal thiosulfinates from garlic and Petiveria are not radical-trapping antioxidants in liposomes and cells, but lipophilic analogs are
Source: PubMed Central journal article supplement (PMC6054074; doi:10.1039/c5sc02270c), 2015-07-29

## Supporting Information

for

The Medicinal Thiosulfinates from Garlic and Petiveria are  
Not Radical-Trapping Antioxidants, but Lipophilic Analogs Are

Bo Li, Feng Zheng, Jean-Philippe R. Chauvin and Derek A. Pratt\*

*Department of Chemistry and Biomolecular Sciences, University of Ottawa, Ottawa, Ontario  
K1N 6N5, Canada  
dpratt@uottawa.ca*

### Table of Contents

|                                                                                                                                                                        |    |
|------------------------------------------------------------------------------------------------------------------------------------------------------------------------|----|
| Figure S1. Samples of MeOAMVN-mediated oxidations of liposomes and curve fitting for relative rates.....                                                               | S2 |
| Table S1. Relative rate constants for the reactions of 9-triptycenesulfenic acid <b>3</b> and hexylated petivericin <b>4</b> with MeOAMVN-derived peroxy radicals..... | S3 |
| Figure S2. Hydroperoxide production in the oxidation of PLPC liposomes supplemented with hexylated petivericin <b>4</b> and NAC.....                                   | S3 |
| Figure S3. Decomposition of allicin <b>1</b> and petivericin <b>2</b> .....                                                                                            | S4 |
| Figure S4. Decomposition of petivericin <b>2</b> in liposomes in the presence of NAC and formation of the corresponding mixed disulfide.....                           | S5 |
| Figure S5. Decomposition of hexylated petivericin <b>4</b> in liposomes in the presence of NAC and formation of the corresponding mixed disulfide.....                 | S5 |

Figure S6. Representative dose-response curves on lipid peroxidation inhibition obtained from flow cytometry in HEK293 cells.....S6

Figure S7. Representative dose-response curves obtained from papain inactivation assay.....S7

<sup>1</sup>H and <sup>13</sup>C NMR spectra of compounds **5-10**.....S8-13

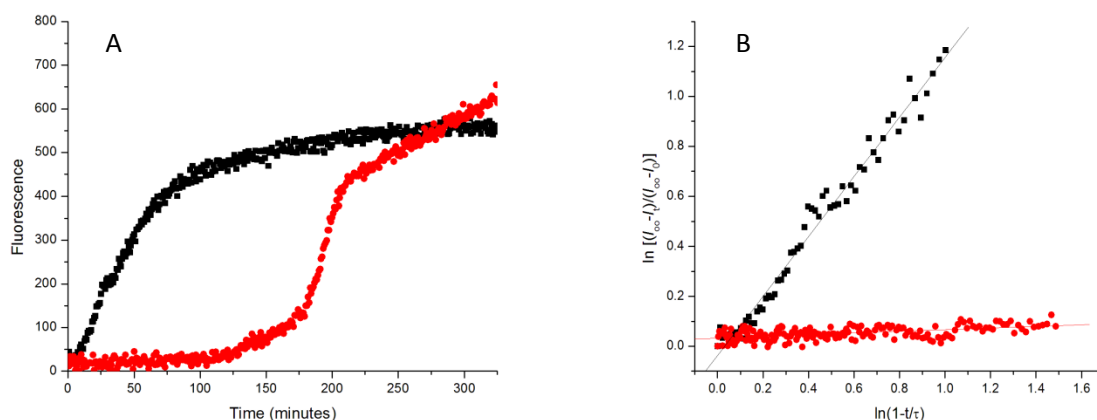

**Figure S1.** (A) Representative fluorescence (at 520 nm) intensity-time profiles from MeOAMVN-mediated (0.2 mM) oxidations of egg phosphatidylcholine liposomes (1 mM in PBS buffer, pH 7.4) containing 0.15  $\mu$ M H<sub>2</sub>B-PMHC and 4.5  $\mu$ M of 9-triptycenesulfenic acid (red) and hexylated petivericin (black). (B) The data in (A) plotted according to Eq. (4) for 9-triptycenesulfenic acid (red) and hexylated petivericin (black).

**Table S1.** Relative rate constants for the reactions of 9-triptycenesulfenic acid (**3**) and hexylated petivericin (**4**) with MeOAMVN-derived peroxy radicals derived from data in Figure 1C and 1D.

| [Antioxidant]  | $k_{\text{inh}}^{\text{H2B-PMHC}}/k_{\text{inh}}^{\text{3}}$ | $k_{\text{inh}}^{\text{H2B-PMHC}}/k_{\text{inh}}^{\text{4}}$ |
|----------------|--------------------------------------------------------------|--------------------------------------------------------------|
| 4.5            | 0.040                                                        | 0.948                                                        |
| 9.0            | 0.043                                                        | 1.134                                                        |
| 13.5           | 0.042                                                        | 1.192                                                        |
| 18             | 0.039                                                        | 1.071                                                        |
| 22.5           | 0.036                                                        | 0.965                                                        |
| <b>average</b> | <b>0.040±0.004</b>                                           | <b>1.06±0.11</b>                                             |

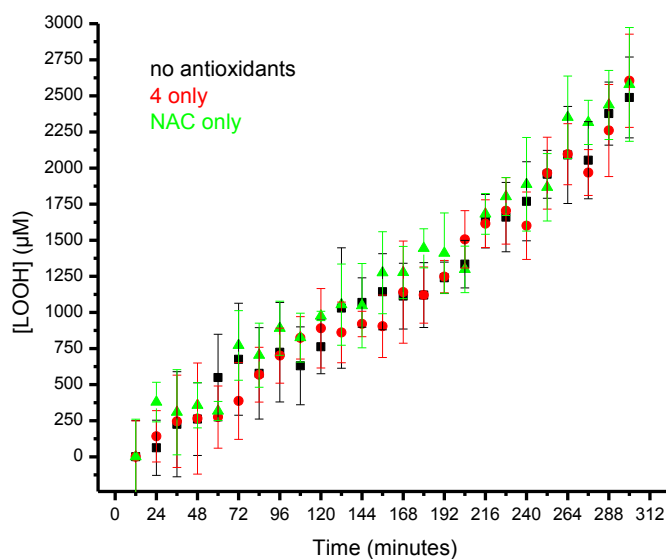

**Figure S2.** Hydroperoxide production in the oxidation of 1-palmitoyl-2-linoleyl-*sn*-glycero-3-phosphocholine liposomes (13.3 mM in phosphate-buffered saline, pH 7.4) initiated by MeOAMVN (150 µM) in the presence of 25 µM **4** only (red), 25 µM N-acetylcysteine only (green), or no additives (black).

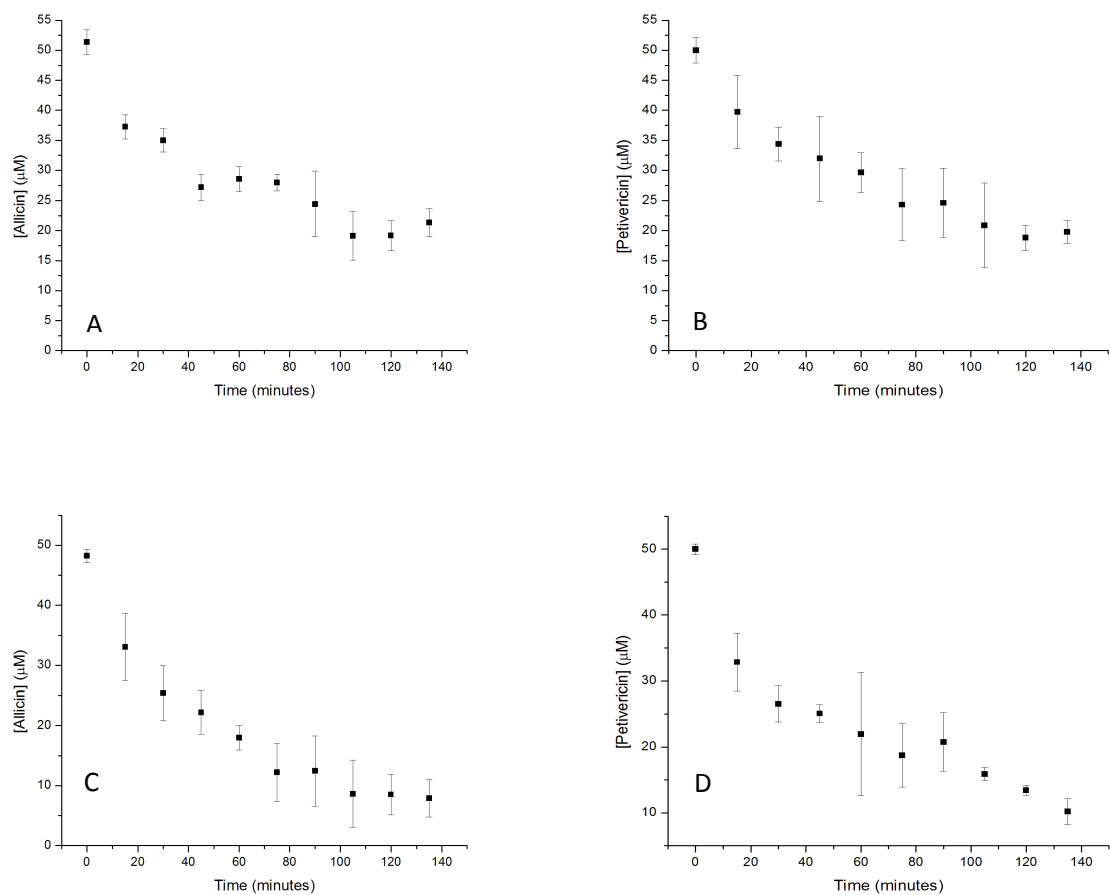

**Figure S3.** Decomposition of 50  $\mu\text{M}$  allicin **1** without MeOAMVN (A) or with 0.2 mM MeOAMVN and 0.15  $\mu\text{M}$  H<sub>2</sub>B-PMHC (C); and Decomposition of 50  $\mu\text{M}$  petivericin **2** without MeOAMVN (B) or with 0.2 mM MeOAMVN and 0.15  $\mu\text{M}$  H<sub>2</sub>B-PMHC (D) in unilamellar egg phosphatidylcholine liposomes.

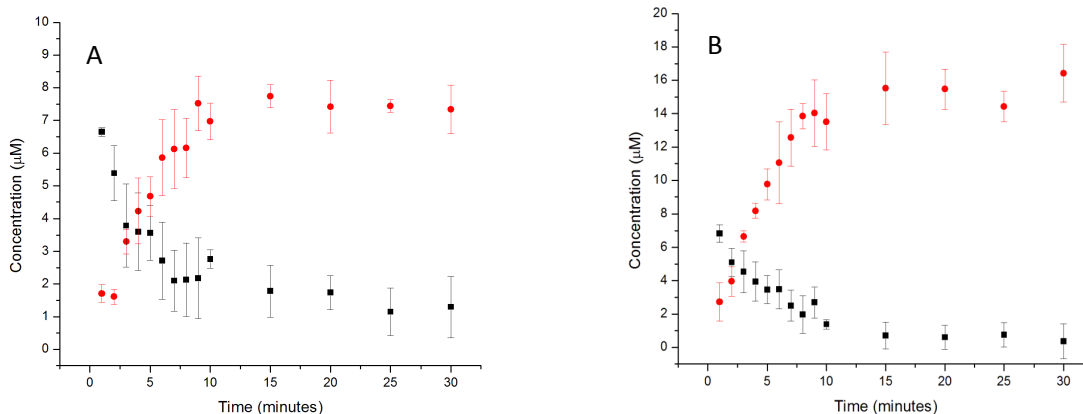

**Figure S4.** Decomposition of 7.5  $\mu\text{M}$  petivericin 2 (■) in MeOAMVN-mediated (0.2 mM) oxidations of egg phosphatidylcholine liposomes (1 mM) containing 0.15  $\mu\text{M}$  H<sub>2</sub>B-PMHC and either 7.5  $\mu\text{M}$  (A) or 15  $\mu\text{M}$  NAC (B) in PBS buffer of pH 7.4 and formation of the corresponding mixed disulfide (●).

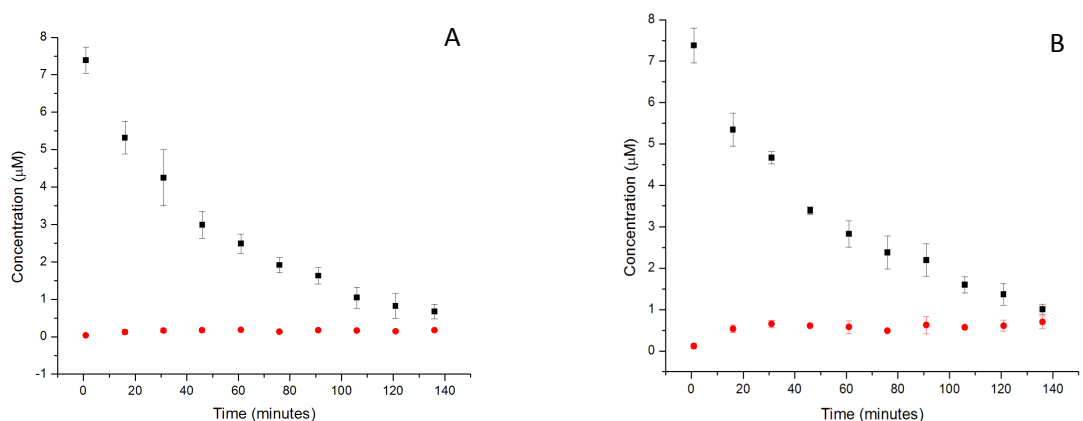

**Figure S5.** Decomposition of 7.5  $\mu\text{M}$  hexylated petivericin 4 (■) in MeOAMVN-mediated (0.2 mM) oxidations of egg phosphatidylcholine liposomes (1 mM) containing 0.15  $\mu\text{M}$  H<sub>2</sub>B-PMHC and 7.5  $\mu\text{M}$  (A) or 15  $\mu\text{M}$  NAC (B) in PBS buffer of pH 7.4 and formation of the corresponding mixed disulfide (●).

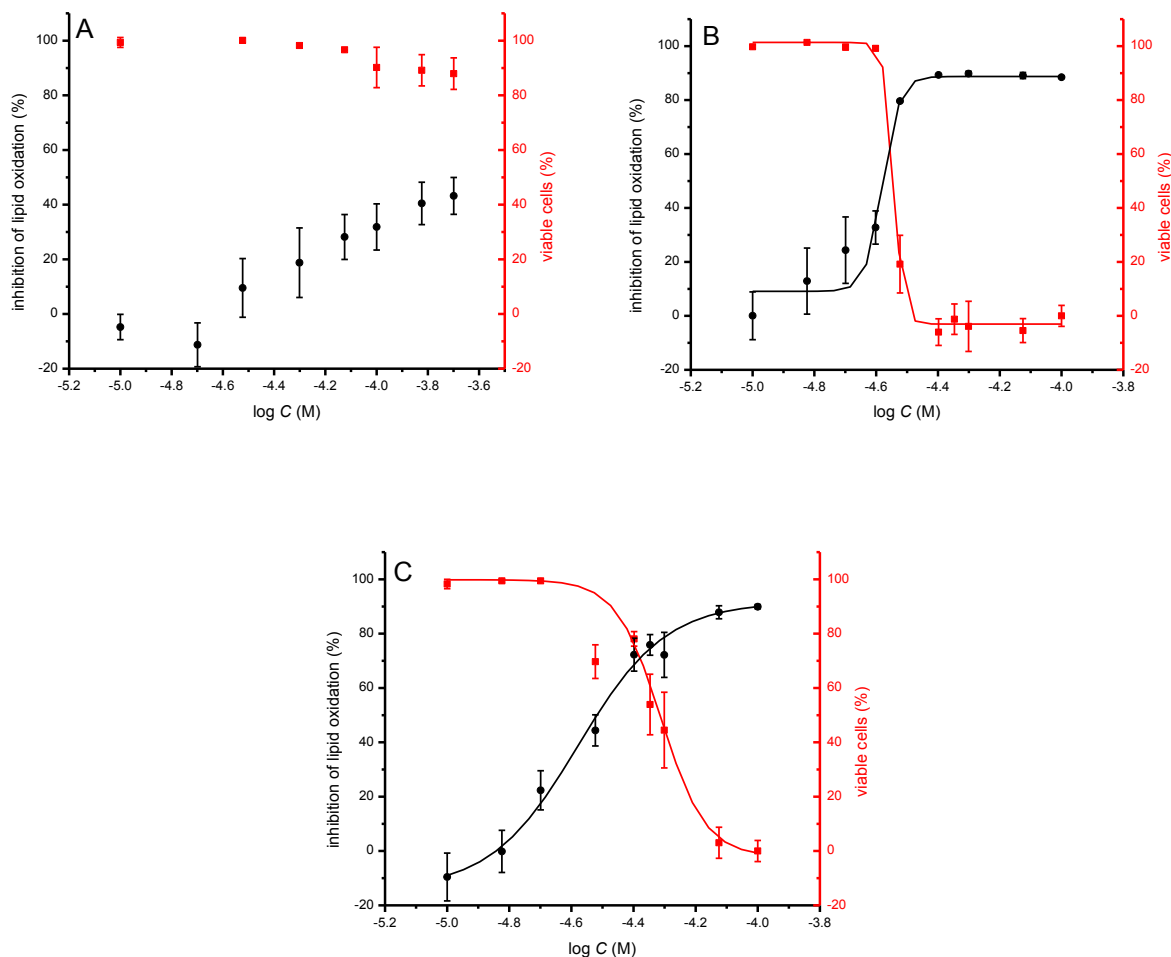

**Figure S6.** Representative dose-response curves obtained from flow cytometry ( $1 \times 10^6$  cells/mL;  $\lambda_{\text{ex}} = 488$  nm,  $\lambda_{\text{em}} = 525 \pm 25$  nm; 10,000 events) following induction of oxidative stress with diethylmaleate (DEM, 9 mM) in HEK293 cells grown in MEM media containing either hexylated petivericin (**4**, A), allicin (**1**, B) or petivericin (**2**, C) (5-200  $\mu\text{M}$ ) for 22 hours at 37  $^\circ\text{C}$ . Cells were incubated with the lipid peroxidation reporter C11-BODIPY<sup>581/591</sup> (1  $\mu\text{M}$ ) for 30 minutes prior to DEM treatment.

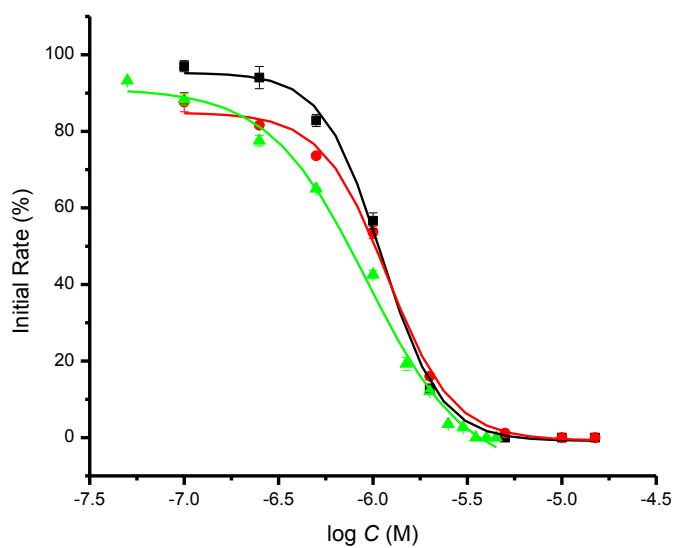

**Figure S7.** Representative dose-response curves obtained from papain inactivation assay in EDTA/sodium acetate buffer (pH 6.1) for hexylated petivericin (**4**, green;  $IC_{50} = 1.0 \pm 0.1 \mu M$ ), allicin (**1**, red;  $IC_{50} = 1.2 \pm 0.2 \mu M$ ) or petivericin (**2**, black;  $IC_{50} = 1.1 \pm 0.1 \mu M$ ). Papain activity was determined by measuring the rate of increase of absorbance at 410 nm.

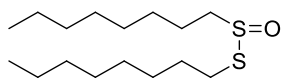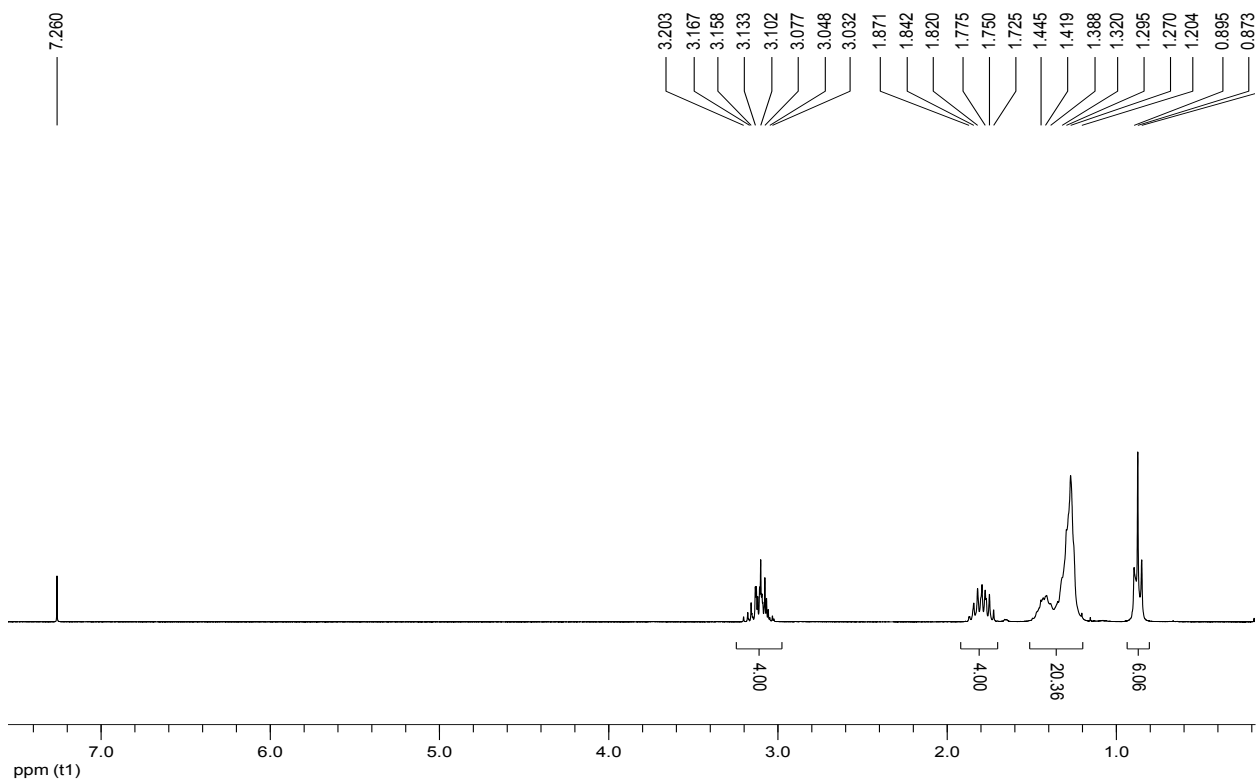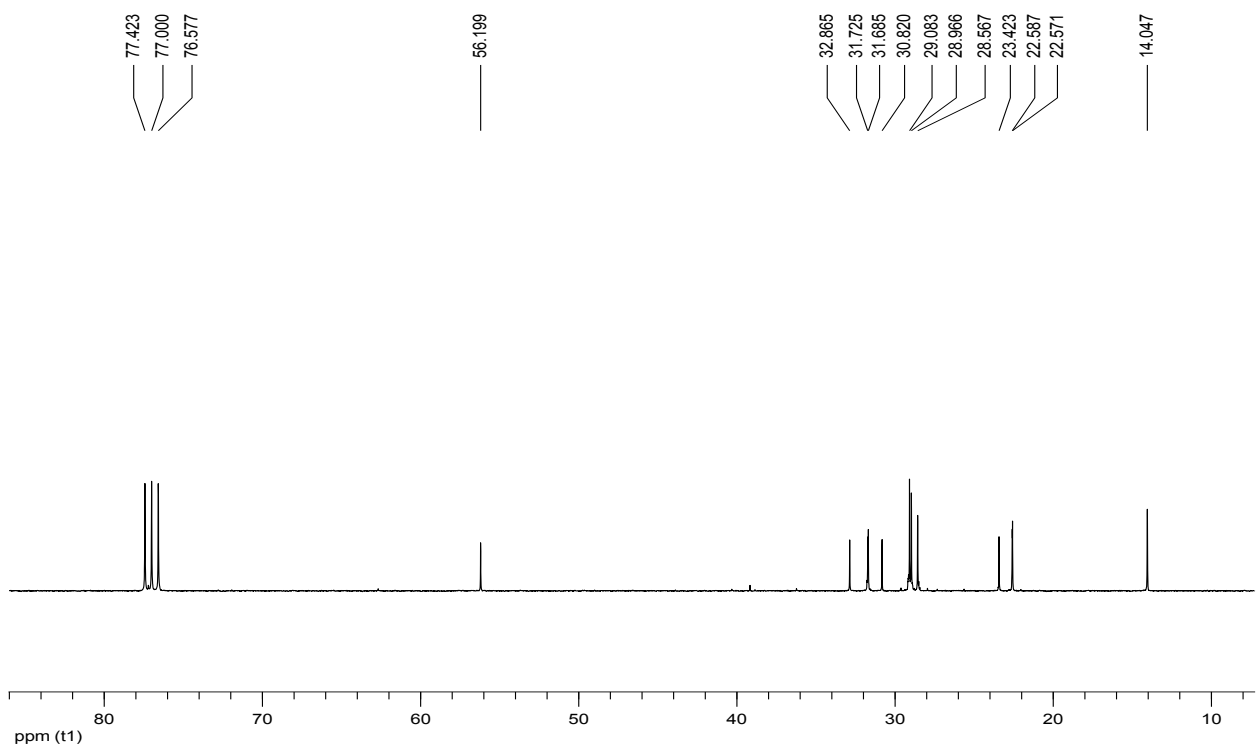



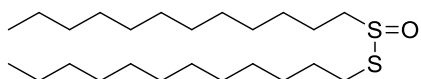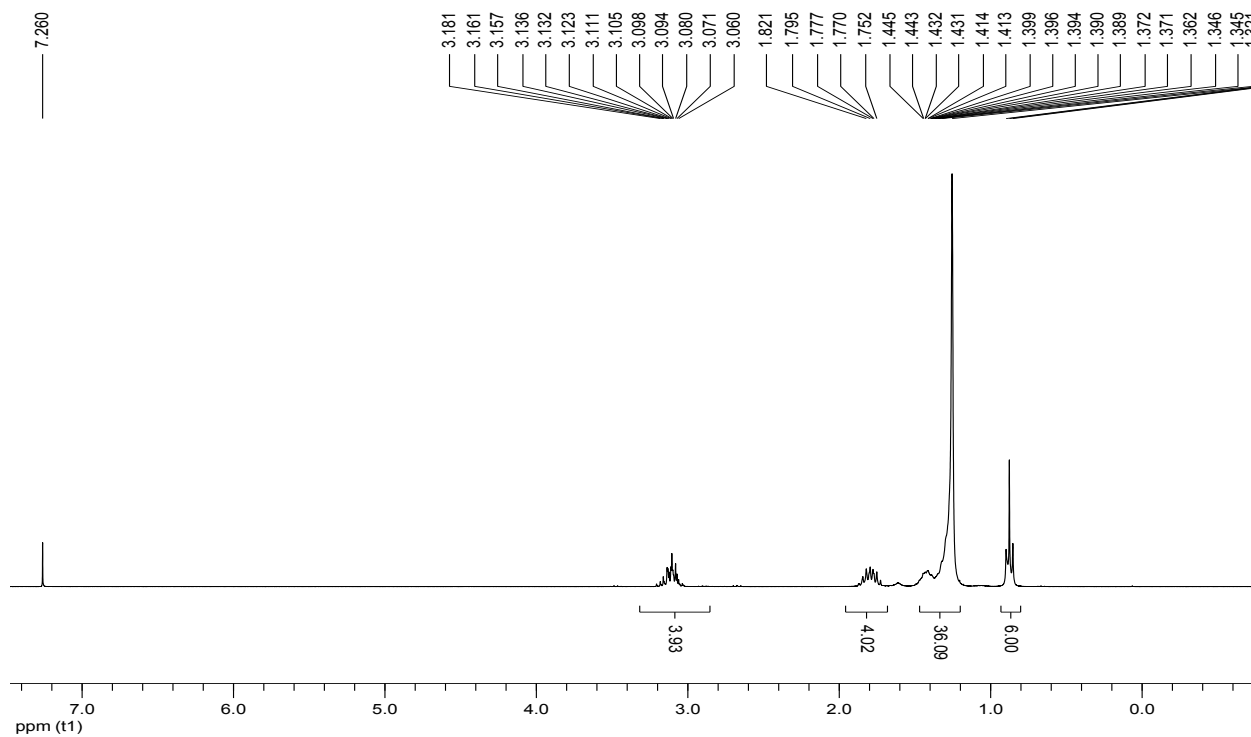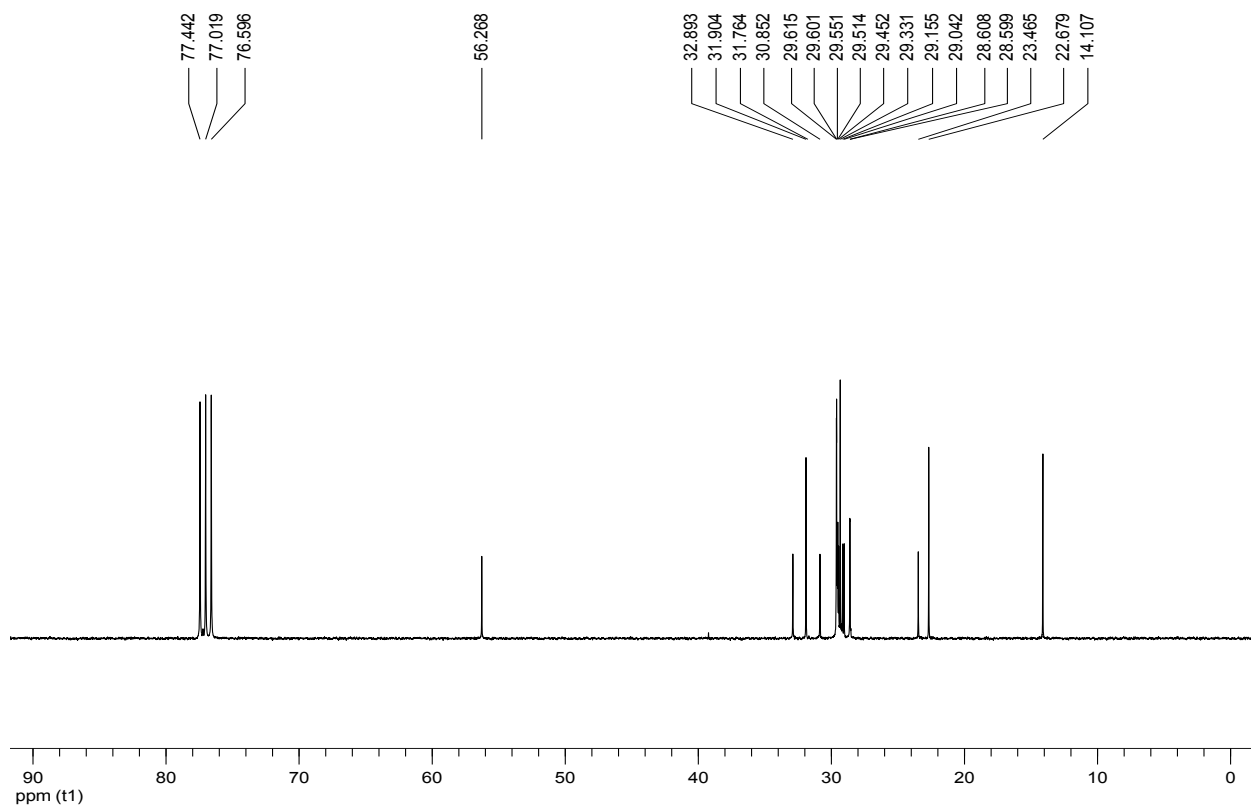

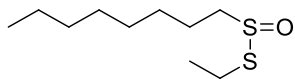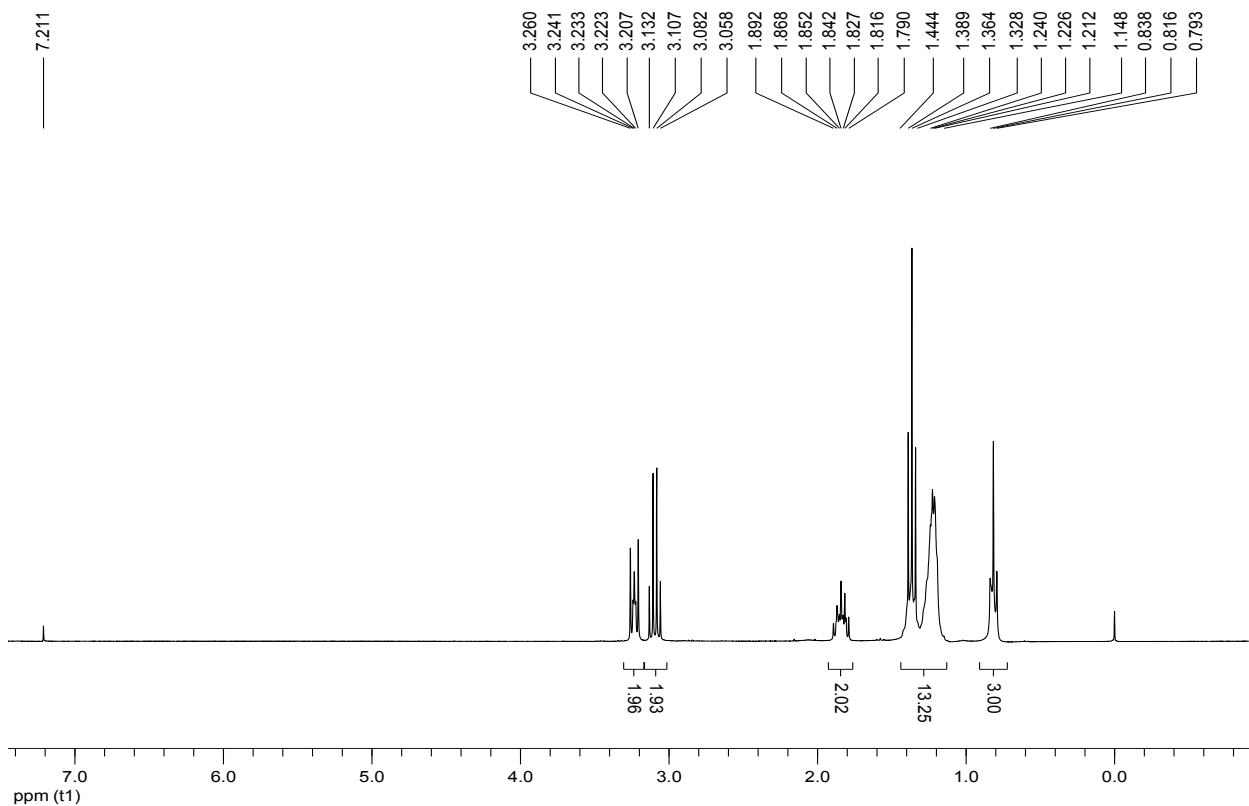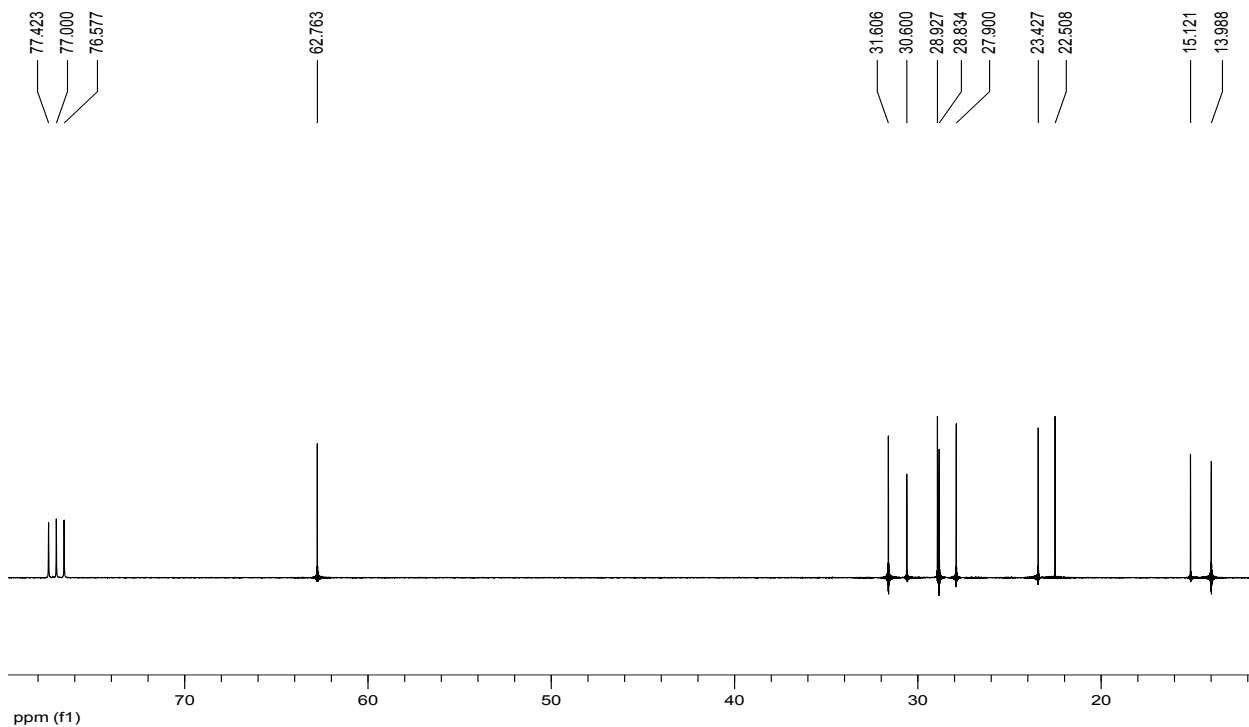

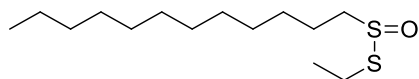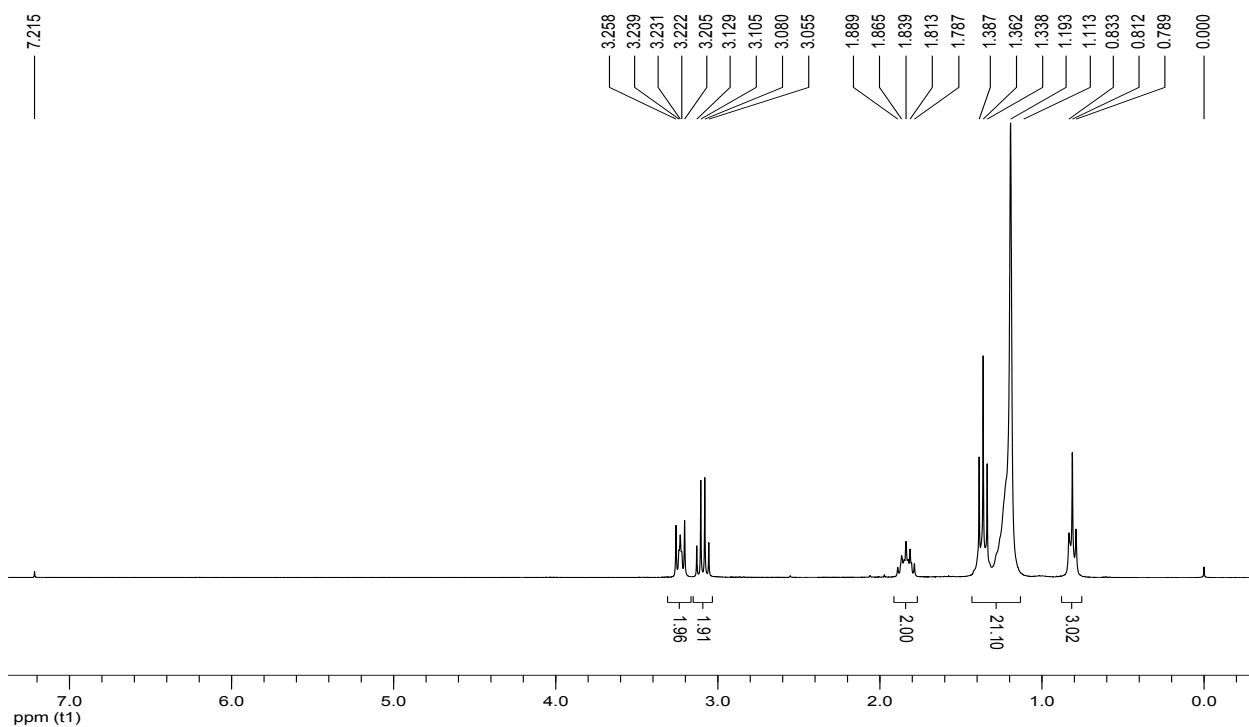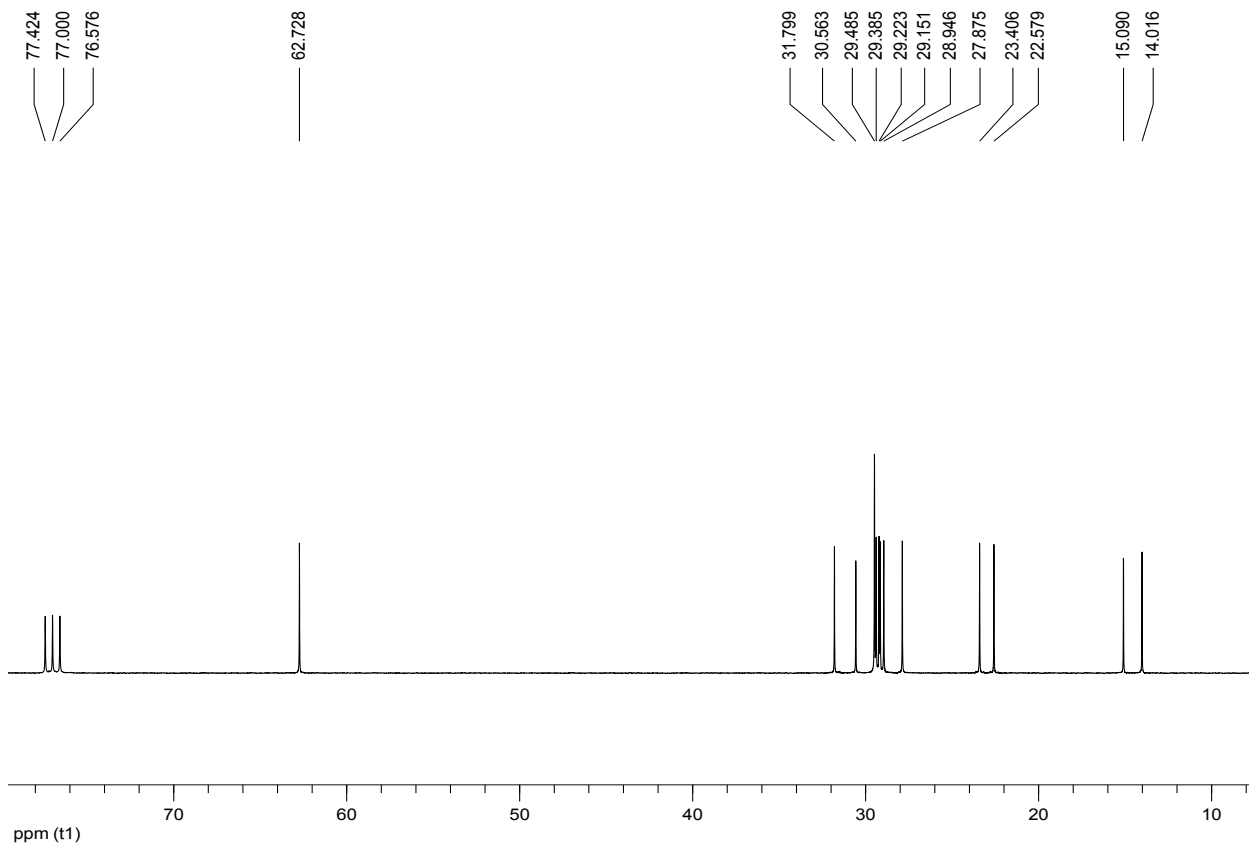

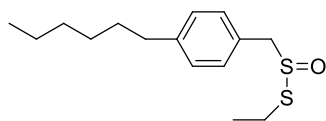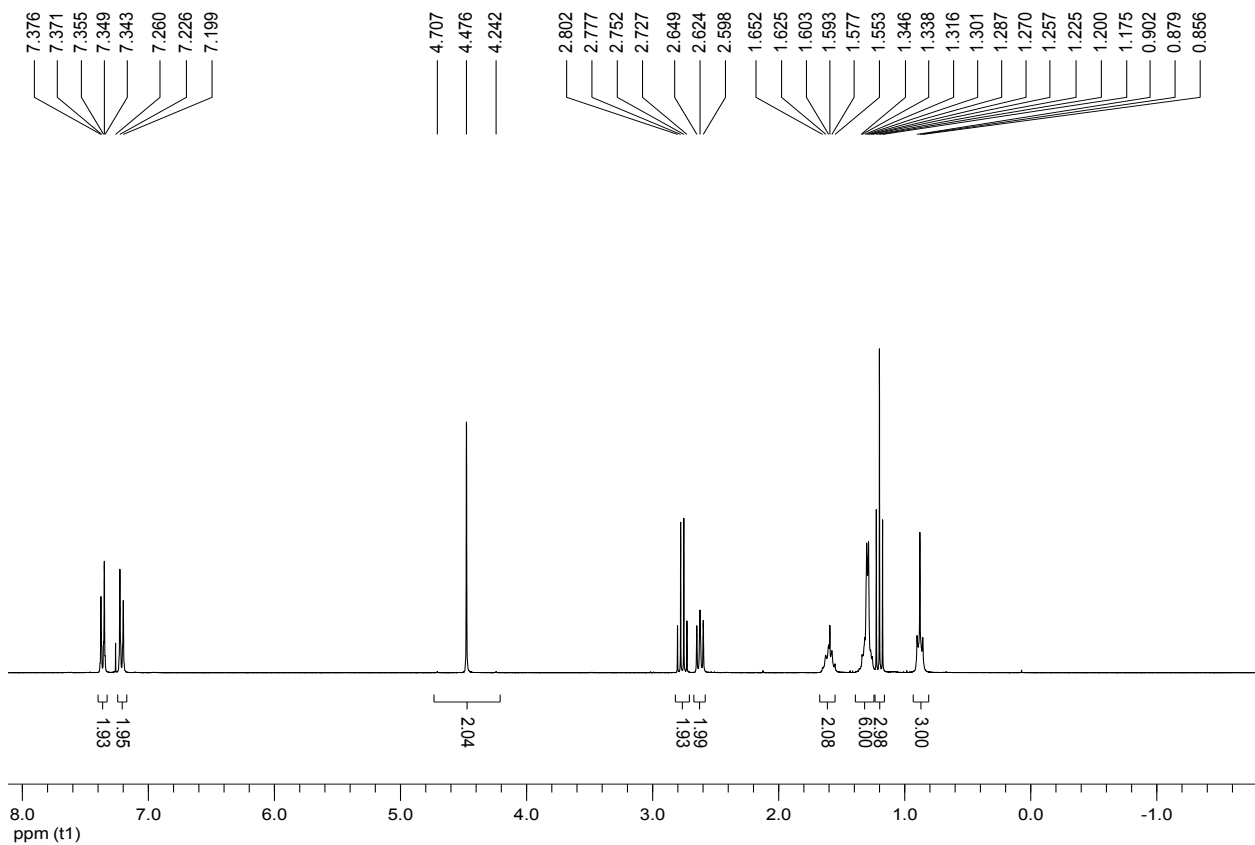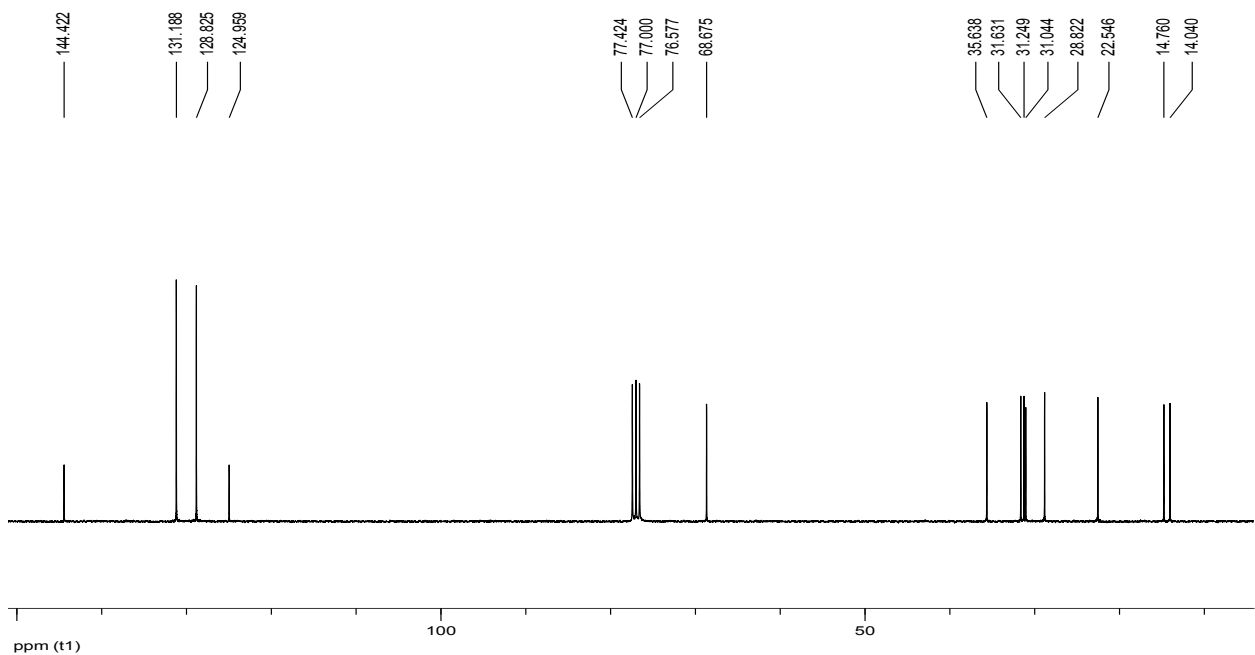

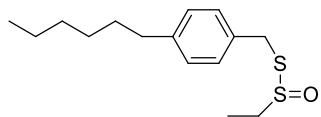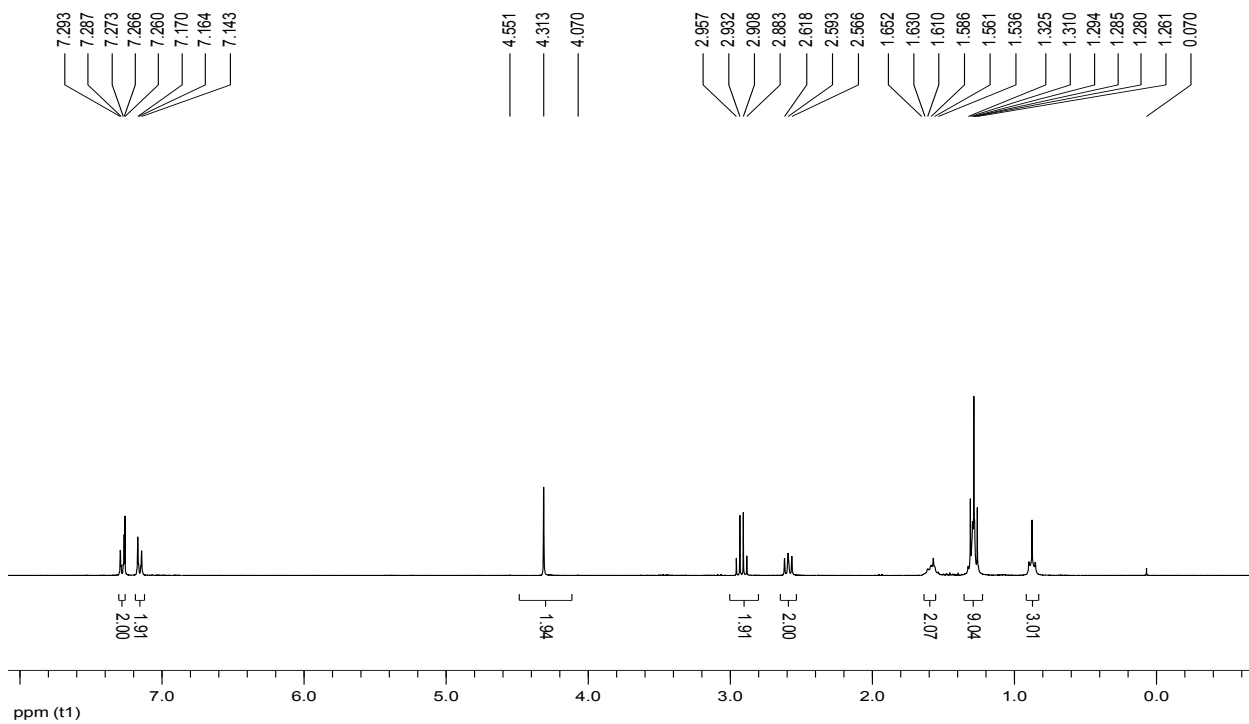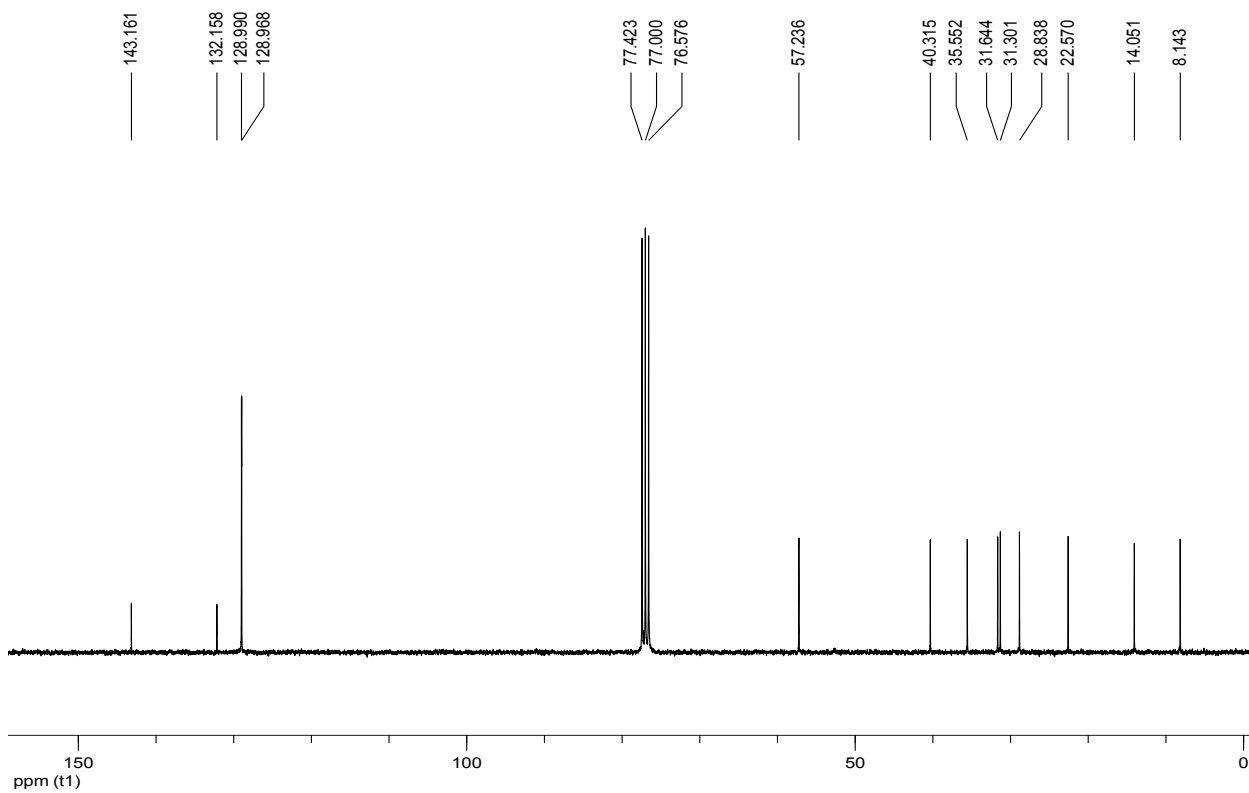

Supplement: SC-006-C5SC02270C-s001.pdf [file SC-006-C5SC02270C-s001.pdf]
